# Supplementary material for: Environmental Sex Determination in the Branchiopod Crustacean Daphnia magna: Deep Conservation of a Doublesex Gene in the Sex-Determining Pathway
Source: PLOS journal article supplement (doi:10.1371/journal.pgen.1001345), 2011-03-24
Supplement: S9 (10.1371/journal.pgen.1001345.s009) [file journal.pgen.1001345.s009]

|  | Fwd (5’ to 3’) | Rev (5’ to 3’) |
| --- | --- | --- |
| DSX1 antisense | TAATACGACTCACTATAGGGGCAAAAGACCACATCTTC | AAGTGGCGCTGAGACGAGCTCAAGC |
| DSX1 sense | TAATACGACTCACTATAGGGAGCAAGTGGCGCTGAGAC | CGCAAAAGACCACATCTTCATCACAG |
| DSX2 antisense | TAATACGACTCACTATAGGGGTTGTTGGGGTTTAGTGT | GTAGCCAGTAGACGGGCCCAGCAAC |
| DSX2 sense | TAATACGACTCACTATAGGGAGGTAGCCAGTAGACGGG | GTTGTTGGGGTTTAGTGTATTCAGTCA |
| Vasa antisense | TAATACGACTCACTATAGGGCTTCAGCTTCAGTAGGCA | GTGACCTCGTTTTACCCCAAAGCGCAC |
| Vasa sense | TAATACGACTCACTATAGGGGTGACCTCGTTTTACCCCA | TCTTCAGCTTCAGTAGGCAGAGCAGCAG |
